# Supplementary material for: Heterometallic Co(ii)–Ru2(ii,iii) carbonates: from discrete ionic crystals to three-dimensional network
Source: Royal Society of Chemistry journal article supplement (doi:10.1039/c3ce40517f), 2013-01-01
Supplement: c3ce40517f.pdf [file c3ce40517f.pdf]

## Electronic Supporting Information (ESI)

# Heterometallic Co(II)-Ru<sub>2</sub>(II,III) Carbonates: From Discrete Ionic Crystals to Three-Dimensional Network

Bin Liu,<sup>a,\*</sup> Dan Wang,<sup>a</sup> Jin Jin,<sup>a</sup> Xue-Mei Liu,<sup>a</sup> Yan-Yan Jia,<sup>a</sup> Gang-Lin Xue,<sup>a</sup>

<sup>a</sup>Key Laboratory of Synthetic and Natural Functional Molecule Chemistry of Ministry of Education, College of Chemistry & Materials Science, Shaanxi Key Laboratory of Physico-Inorganic Chemistry, Northwest University, Xi'an 710069, P. R. China

Corresponding Author: [liubin@nwu.edu.cn](mailto:liubin@nwu.edu.cn) (B. Liu). Fax: +86-29-88302604.

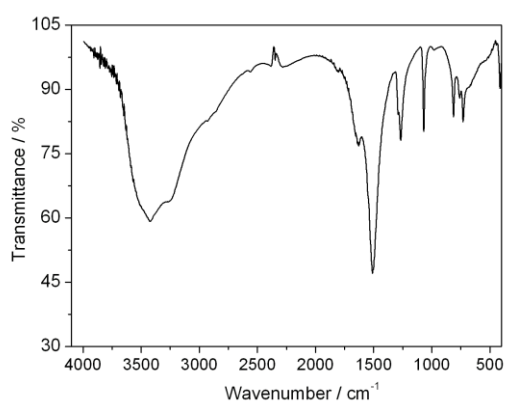

Fig S1. IR spectra of complex 1.

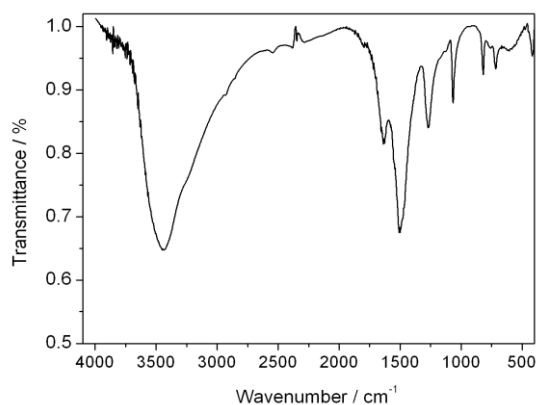

Fig S2. IR spectra of complex 2.

---

\* Corresponding author. Tel./fax: +86-029-88302604.

E-mail address: [liubin@nwu.edu.cn](mailto:liubin@nwu.edu.cn) (B. Liu)

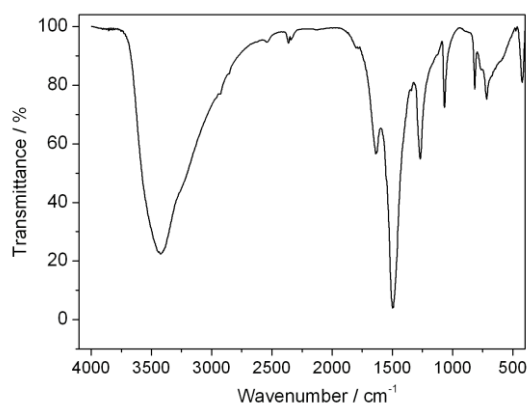

Fig S3. IR spectra of complex **3**.

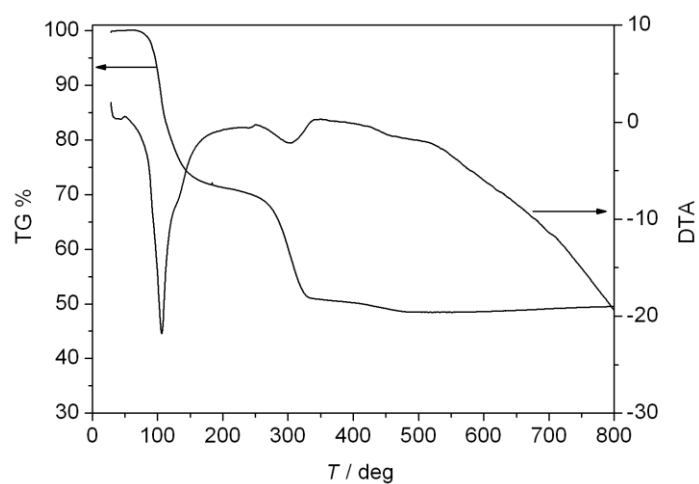

Fig. S4a TG and DTA curve of complex **1**

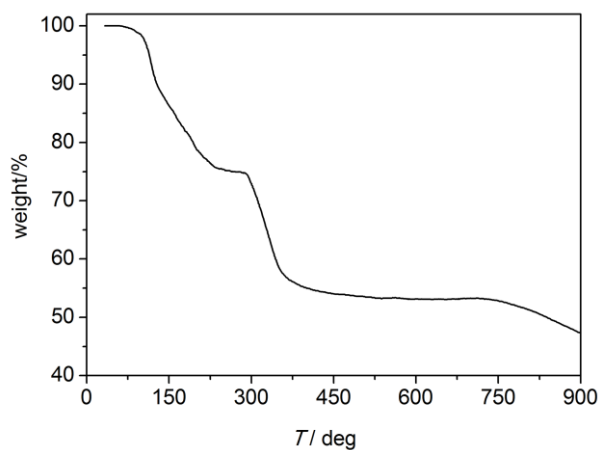

Fig. S4b TG and DTA curve of complex **2**

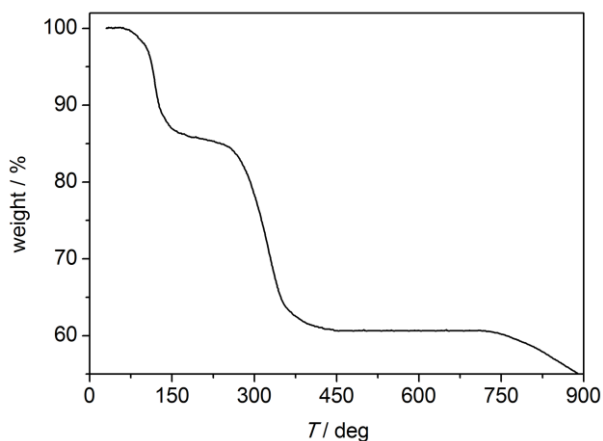

Fig. S4c TG and DTA curve of complex 3

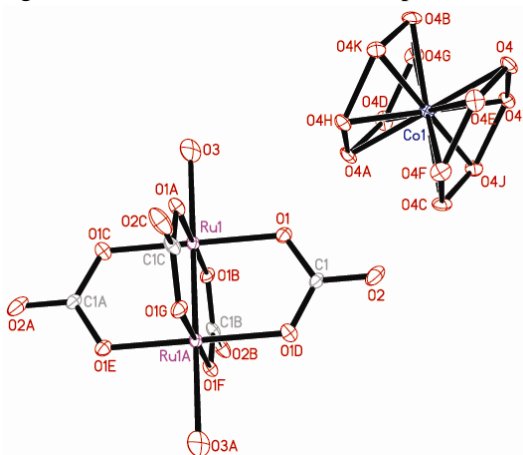

Fig. S5 ORTEP representation (30% thermal probability ellipsoids) of the crystal structure of 1.

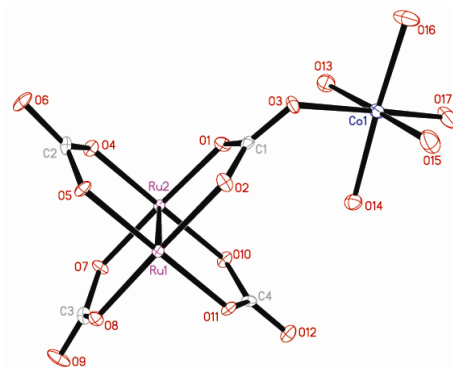

Fig. S6 ORTEP representation (30% thermal probability ellipsoids) of the crystal structure of 2

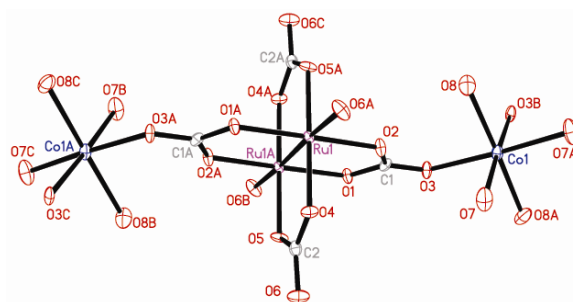

Fig. S7 ORTEP representation (30% thermal probability ellipsoids) of the crystal structure of 3.

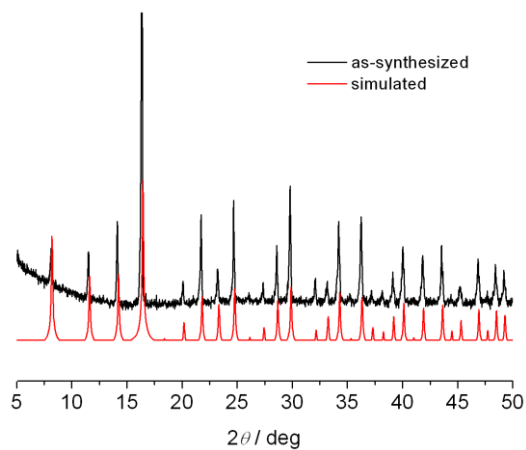

**Fig. S8** Comparison of XRPD patterns of the simulated and as-synthesized of **1**.

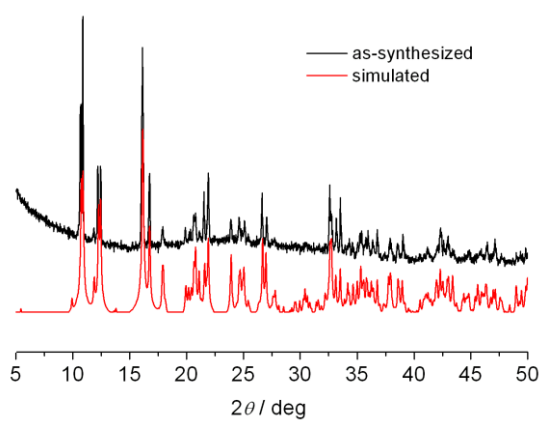

**Fig. S9** Comparison of XRPD patterns of the simulated and as-synthesized of **2**.

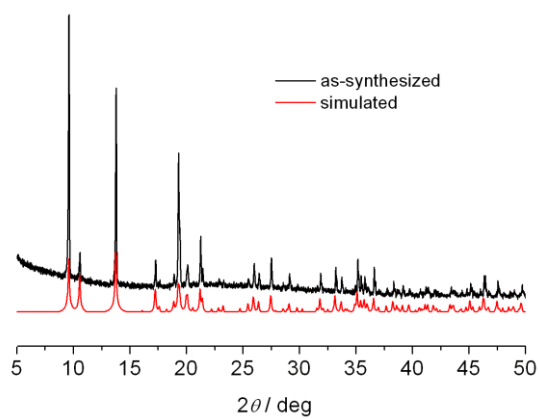

**Fig. S10** Comparison of XRPD patterns of the simulated and as-synthesized of **1**.

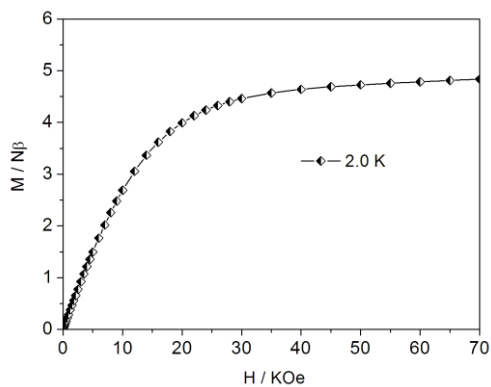

**Fig. S11.**  $M$  vs  $H$  plot for complex 1

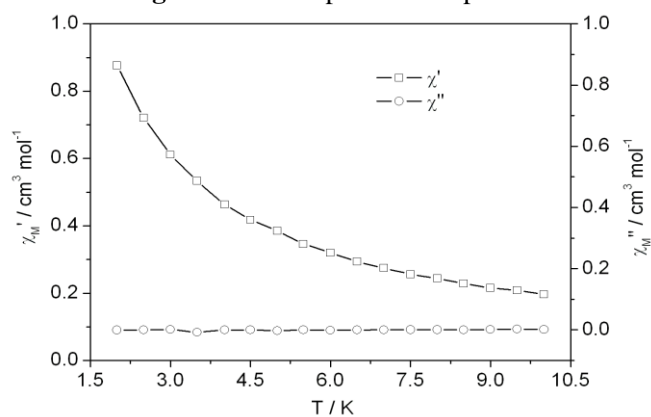

**Fig. S12**  $\chi_M'$  and  $\chi_M''$  vs  $T$  plots for complex 1.

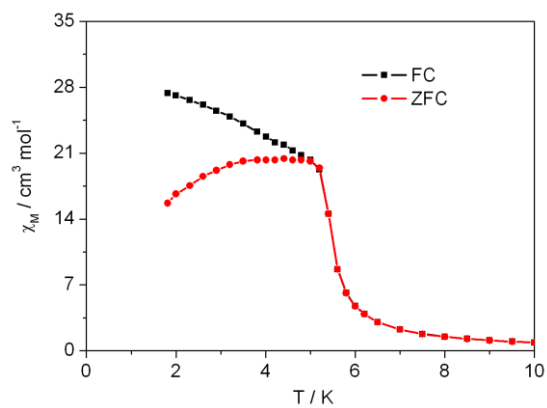

**Figure S13.** Temperature dependence of FC and ZFC plots for 2 at 10 Oe.

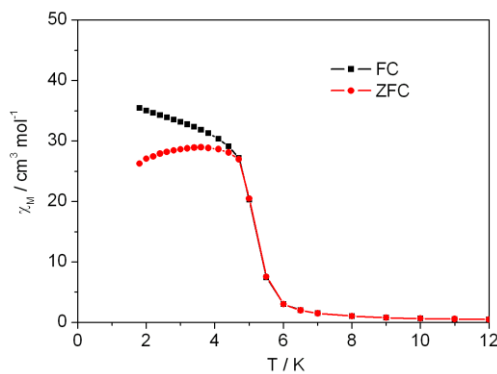

**Figure S14.** Temperature dependence of FC and ZFC plots for 3 at 10 Oe

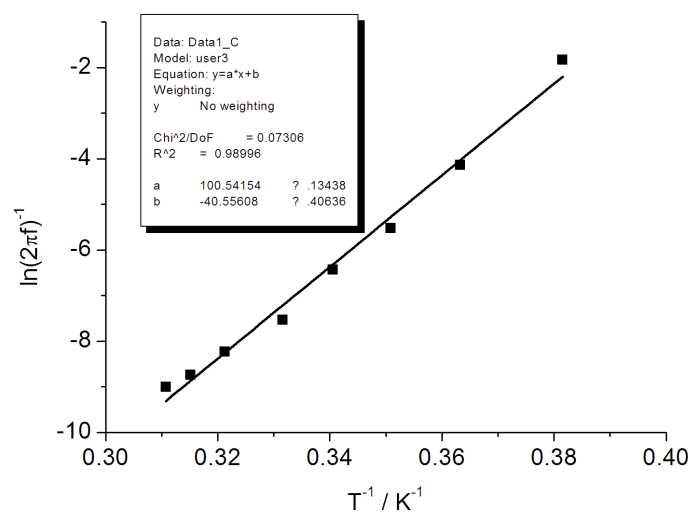

**Fig. S15** the frequency dependence of  $T_p$  on  $\chi_M''$  fitted in the Arrhenius law.

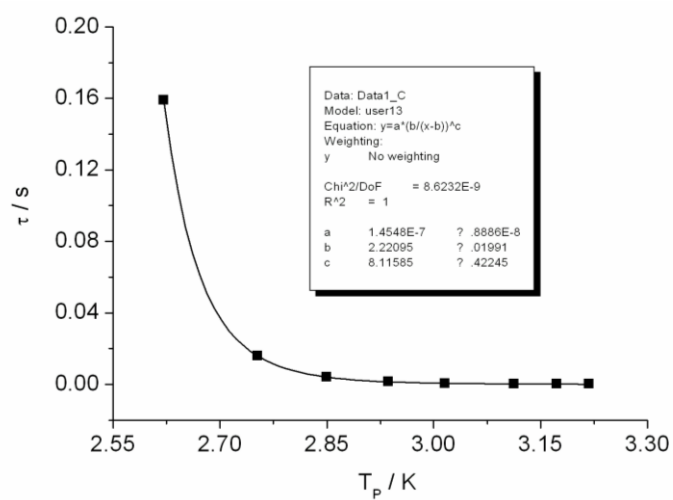

**Fig. S16** data fitted by the conventional critical scaling law of the spin dynamics.
